# Supplementary material for: Школьная реформа Екатерины II
Source: Royal Society of Chemistry journal article supplement (doi:10.1039/d3nr01978k), 2010-01-01
Supplement: d3nr01978k1.pdf [file d3nr01978k1.pdf]

# Supplementary Information to “Evaluating strain and doping of Janus MoSSe from phonon mode shifts supported by ab-initio DFT calculations”

Jennifer Schmeink, Vladislav Musytschuk, Erik Pollmann, Stephan Sleziona, André Maas,  
Peter Kratzer and Marika Schleberger\*

*Faculty of Physics and CENIDE, University of Duisburg-Essen, Duisburg, Germany*

*\*E-mail: marika.schleberger@uni-due.de,*

*Phone: +49 (0)203 379-1600*

ABSTRACT. Supplementary to the data shown in the main manuscript, we present topography images from atomic force microscopy measurements correlated with Raman mappings of the sample to ensure its homogeneity and monolayer status. Moreover, Raman spectra of a multilayer MoSe<sub>2</sub> part of a sample after the processing. This gives additional information on how the process cuts and replaces the Se-bonds and shows an as-processed heterostructure of a monolayer MoSSe on top of few-layer MoSe<sub>2</sub>. Additional DFT calculations for the doping and strain levels of monolayer MoS<sub>2</sub> are shown for comparison of doping level of the Janus monolayer. Moreover, we present a more detailed comparison of the temperature-dependent PL of MoSSe in comparison with MoSe<sub>2</sub> and MoS<sub>2</sub>, both of which show realistic values for the parameters of the respective Varshni-fits, corroborating our data for the Janus MoSSe monolayer further. Lastly, we present a calibration spectrum for the TCSPC measurement and explain some of its follies, as well as spectra of the other TCSPC measurements from different points on monolayer MoSSe.

## 1. AFM TOPOGRAPHY CORRELATED WITH RAMAN MAPPINGS

An important quality characteristic of the Janus monolayer after processing is its homogeneity which we will discuss in the following. We observe it via Raman-mappings in direct correlation to atomic force microscopy (AFM) images. The result is shown in Fig. S1 before and after the conversion. As seen in the topography (see Fig. S1 (a)), before the thermal sulfurization process, the as-exfoliated flake consists of a thicker part and a monolayer region. This is also reflected in the Raman mapping (b), which shows the typical shift of the  $A_{1g}$  out-of-plane vibrational mode to lower wave numbers when thinned down. The images taken before processing show residues from the glue of the tape used for the mechanical exfoliation as well as other adsorbates. These, however, do not appear to have any influence on the Raman signal in the mapping shown in Fig. S1 (b). After the thermal sulfurization process, we observe in the topography in Fig. S1 (c) that the flake appears to be significantly cleaner. The adsorbates and glue residues have desorbed after the annealing and therefore the surface of the flake appears much smoother. Additionally, the step height is reduced by  $\sim 300$  pm from 1.5 nm to 1.2 nm for the same reason, while still being larger than the nominal monolayer height of  $3.28 \text{ \AA}$  [1]. This height discrepancy can be attributed to both surface and trapped water layers. The trapped water underneath exfoliated flakes is encapsulated by the flake itself and therefore cannot be fully removed, even when annealed at high temperatures. Previous studies have shown that this leads to an increased step height in the AFM on the order of 1 nm [2], which is in good agreement with our step height discrepancy. The processing does of course not only affect the morphology but also the materials' composition, which is clearly shown by the Raman mapping presented in Fig. S1 (d). A very distinctive difference between the monolayer MoSSe and the thicker multilayer part can be seen. The zoom-in shows the homogeneity of the Janus monolayer as derived from the  $A_{1g}$  peak position. Correlating this mapping with the AFM image in (c), one can identify the few inhomogeneous spots in the monolayer as structural inhomogeneities. These particles could be sulfur residues from the processing, as it is known that

gaseous sulfur preferably forms clusters [3]. Important to note here: the mapping highlights only the most dominant mode (excluding the Si-peak), as the scale bar shows. Therefore, not shown in this mapping, is the fact that the multilayer region can be interpreted as a heterostructure, as the top-most layer is also converted to Janus MoSSe, while the layers below remain MoSe<sub>2</sub>. For full spectra taken on multilayer heterostructure parts, see the supporting information, Fig. S2.

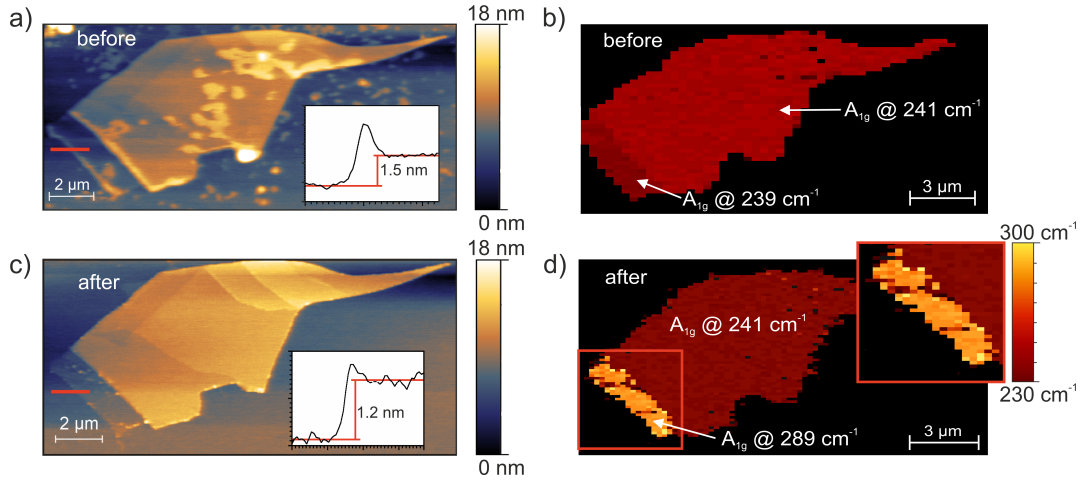

FIGURE S1. **Correlating ambient AFM topography and Raman mappings.** (a) AFM topography and (b) Raman mapping of the A<sub>1g</sub>-mode before, and (c) and (d) after the thermal processing. The insets in the AFM images show the height profile of the monolayer at the red lines in the images. The mapping after the process shows the homogeneity in the monolayer as highlighted in the zoom-in shown in (d).

## 2. MULTILAYER MOSE<sub>2</sub> POST PROCESSING

As alluded to in the main body of this scientific paper, our method of sulfurizing as-exfoliated MoSe<sub>2</sub> flakes does not only yield high quality Janus MoSSe monolayer, but also multilayered heterostructures. Such a multilayered flake before and after the sulfurization process is seen in Fig. S2 (a). Note that the layer numbers in the image inset is acquired through AFM data. Here, the Raman signature of the multilayer acquired shows clearly the shift from pure MoSe<sub>2</sub> to a mixture of such with MoSSe typical modes emerging as well. The shear modes *S* of the MoSe<sub>2</sub> multilayer are preserved in the heterostructure,

although its intensity drops, as there is one layer less to contribute plus the top most layer MoSSe shields the MoSe<sub>2</sub> layers underneath. Moreover, we clearly see a shift of the A<sub>1g</sub> mode of the MoSe<sub>2</sub> to lower wavenumbers, while the Defect peak *D* shifts slightly to higher wavenumbers. This can be attributed to a higher Defect density in the MoSe<sub>2</sub>, especially a Se-vacancy increase [4]. This can be expected as the thermal etching process targets the Se-atoms specifically and thus this observation is to be expected. Almost of the same intensity as the MoSe<sub>2</sub> A<sub>1g</sub> peak is the out-of-plane vibrational mode of the Janus MoSSe monolayer. The position of the latter is at its monolayer position of 289 cm<sup>-1</sup> (see Fig. S2 (b)), indicating that indeed only the topmost layer seems to be exchanging Se- with S-atoms during the processing. Fig. S2 (b) insinuates that the monolayer MoSSe A<sub>1g</sub> modes intensity is significantly less than that of the heterostructure, however, it is important to understand, that these spectra are calibrated to the Si-peak and its intensity increases naturally when observing a thinner material on top. Meaning, the seen decrease in intensity is only due to the increase of the Si-signal as the obscuring power of the monolayer is less than that of a multilayered material.

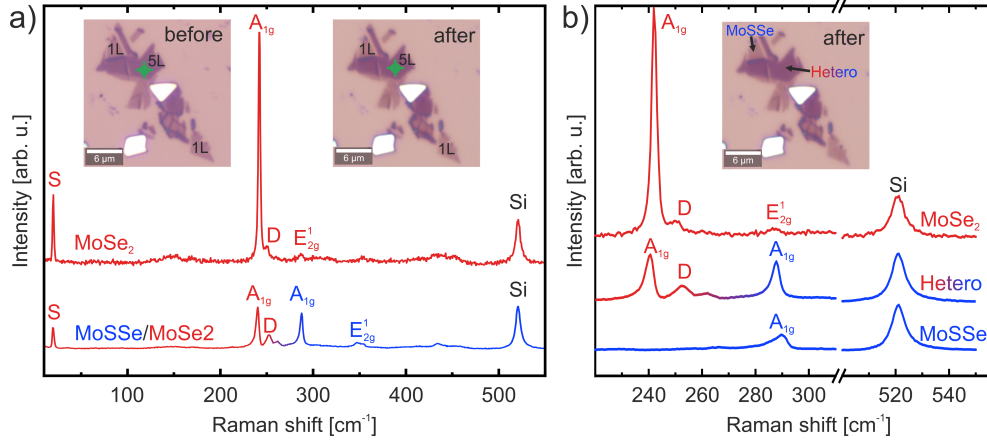

FIGURE S2. **MoSSe/MoSe<sub>2</sub> heterostructure.** (a) Raman spectra before and after the sulfurization process on a multi layer part of an as-exfoliated flake taken at the green dot in the images. S indicates a shear mode typical for MoSe<sub>2</sub> bulk, D denotes the Se-vacancy dependent defect peak of MoSe<sub>2</sub>. In (b) is a smaller section of the spectra shown, as well as a spectrum taken at the monolayer after the process. The spectra are all normalized on the Si-peak in order to compare intensities before and after.



### 3. STAIN AND DOPING OF MoS<sub>2</sub> AS REFERENCE

As indicated in the main body of this manuscript the doping of the fabricated Janus structure seems comparable to that of our as exfoliated monolayer MoS<sub>2</sub>, therefore determining an approximate level of doping of the MoS<sub>2</sub> reference can lead to a more conclusive comparison. The level of relative doping and strain can be calculated from the relative mode positions of MoS<sub>2</sub>, as shown by Pollmann et al. [5]. The there proposed matrix is given as

$$\begin{pmatrix} \Delta Strain \\ \Delta Doping \end{pmatrix} = \begin{pmatrix} -0.490 \% / \text{cm}^{-1} & 0.073 \% / \text{cm}^{-1} \\ 0.088 \cdot 10^{13} \text{ cm}^{-2}/\text{cm}^{-1} & -0.464 \cdot 10^{13} \text{ cm}^{-2}/\text{cm}^{-1} \end{pmatrix} \cdot \begin{pmatrix} \Delta E_{2g}^1 \\ \Delta A_{1g} \end{pmatrix},$$

with  $\Delta E_{2g}^1$  and  $\Delta A_{1g}$  being the difference in mode position to the reference sample. A representative Raman spectrum of our exfoliated MoS<sub>2</sub> monolayers is given in Fig. S3. The spectrum is normalized onto the Si-peak position of 520.6 cm<sup>-1</sup> [6]. From this spectrum the mode position is determined to be 385.3 cm<sup>-1</sup> and 403.3 cm<sup>-1</sup> for the in- and out-of-plane vibrational mode, respectively. As a reference we rely on the measurements of exfoliated MoS<sub>2</sub> on a sapphire substrate of Panasci et al., who report monolayers with a compressive strain of  $\varepsilon_{ref} = -0.25 \%$  and a n-type doping level of  $n_{ref} = -0.5 \cdot 10^{13} \text{ cm}^{-2}$ \* for E<sub>2g</sub><sup>1</sup> and A<sub>1g</sub> Raman modes at 386.191 cm<sup>-1</sup> and 405.346 cm<sup>-1</sup>, respectively [7]. With these values as the reference we can deduce the relative doping and strain of our exfoliated samples. We conclude our MoS<sub>2</sub> are more tense by  $\Delta Strain = 0.396 \%$  and more n-doped by  $\Delta Doping = -0.334 \cdot 10^{13} \text{ cm}^{-2}$  in comparison to the reference. With the given doping  $n_{ref}$  and strain  $\varepsilon_{ref}$  we can thus conclude our MoS<sub>2</sub> monolayer to have a tensile strain level of  $\varepsilon = 0.146 \%$  and an intrinsic n-type doping of roughly  $n = -0.834 \cdot 10^{13} \text{ cm}^{-2}$ . These values seem appropriate for the context of as-exfoliated monolayer MoS<sub>2</sub> on SiO<sub>2</sub> substrates. For an overview of the values see Tab. S1. As aforementioned a similar, if not even larger level

---

\* Note: Due to the reverse sign of the reference doping compared to our definition, we saw fit to change it accordingly.

of doping is expected for the Janus MoSSe monolayer, as deduced from the similar intensity of the trion contribution in the photoluminescence spectra.

TABLE S1. Raman modes and the calculated strain and doping of the monolayer MoS<sub>2</sub>.

|                     | $\omega_{E_{2g}^1}$ [cm <sup>-1</sup> ] | $\omega_{A_{1g}}$ [cm <sup>-1</sup> ] | $\Delta\omega$ [cm <sup>-1</sup> ] | $\varepsilon$ [%] | $n$ [ $\cdot 10^{13}$ cm <sup>-2</sup> ] |
|---------------------|-----------------------------------------|---------------------------------------|------------------------------------|-------------------|------------------------------------------|
| ML MoS <sub>2</sub> | $385.3 \pm 0.2$                         | $403.3 \pm 0.2$                       | $18.0 \pm 0.3$                     | $0.146 \pm 0.026$ | $-0.834 \mp 0.034$                       |

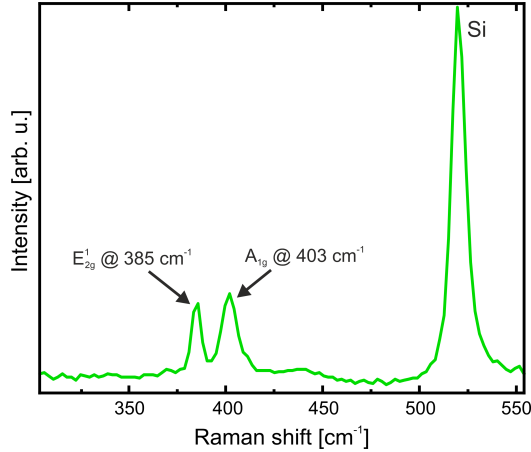

FIGURE S3. **Raman spectrum of as exfoliated monolayer MoS<sub>2</sub> at room temperature.** The spectrum is normalized onto the Si-peak. Labeled are the two Raman active modes of MoS<sub>2</sub>  $E_{2g}^1$  and  $A_{1g}$ .

#### 4. TEMPERATURE DEPENDENT PL IN MO-BASED TMDCs

Additionally to the temperature dependent measurement for the Janus monolayer MoSSe, we show here the ones corresponding to the monolayers of the two base TMDCs. Fig. S4 shows the PL spectra, as well as the corresponding Varshni-fits for both A- and B-excitons. From these plots we deduce the 0 K transition energies for the two excitons as: 1.610 eV, 1.758 eV, and 1.845 eV for the A-exciton and 1.814 eV, 1.938 eV, and 2.006 eV of monolayer MoSe<sub>2</sub>, MoSSe, and MoS<sub>2</sub>, respectively. Moreover, we obtain values for the material specific parameters  $\alpha$  and  $\beta \approx \Theta_{Debye}$ . These are for MoSe<sub>2</sub>  $\alpha = 2.52 \cdot 10^{-4}$  eV/K and  $\Theta_{Debye} \approx 19.513$  K, or  $\alpha = 1.48 \cdot 10^{-4}$  eV/K and  $\Theta_{Debye} \approx 43.303$  K for its A-, and B-exciton's fits, respectively. For MoS<sub>2</sub> these come out to be  $\alpha = 2.18 \cdot 10^{-4}$  eV/K and  $\Theta_{Debye} \approx$

453.10 K, or  $\alpha = 2.28 \cdot 10^{-4}$  eV/K and  $\Theta_{Debye} \approx 151.22$  K for its A-, and B-exciton's fits, respectively. These results are for both materials in good agreement with previous publications [8,9] and theoretical predictions [10]. An overview of these data is given in Table S2.

TABLE S2. Summary of the fit parameters obtained from the different materials' excitons, through applying the Varshni equation.  $E_0$  denotes the 0 K transition energy,  $\alpha$  and  $\beta$  are material specific constants.

| Monolayer<br>Exciton       | MoSe <sub>2</sub> |        | MoSSe  |        | MoS <sub>2</sub> |        |
|----------------------------|-------------------|--------|--------|--------|------------------|--------|
|                            | A                 | B      | A      | B      | A                | B      |
| $E_0$ [eV]                 | 1.610             | 1.814  | 1.758  | 1.938  | 1.845            | 2.006  |
| $\alpha$ [ $10^{-4}$ eV/K] | 2.52              | 1.48   | 3.78   | 3.94   | 2.18             | 2.28   |
| $\beta$ [K]                | 19.513            | 43.303 | 214.05 | 230.05 | 453.10           | 151.22 |

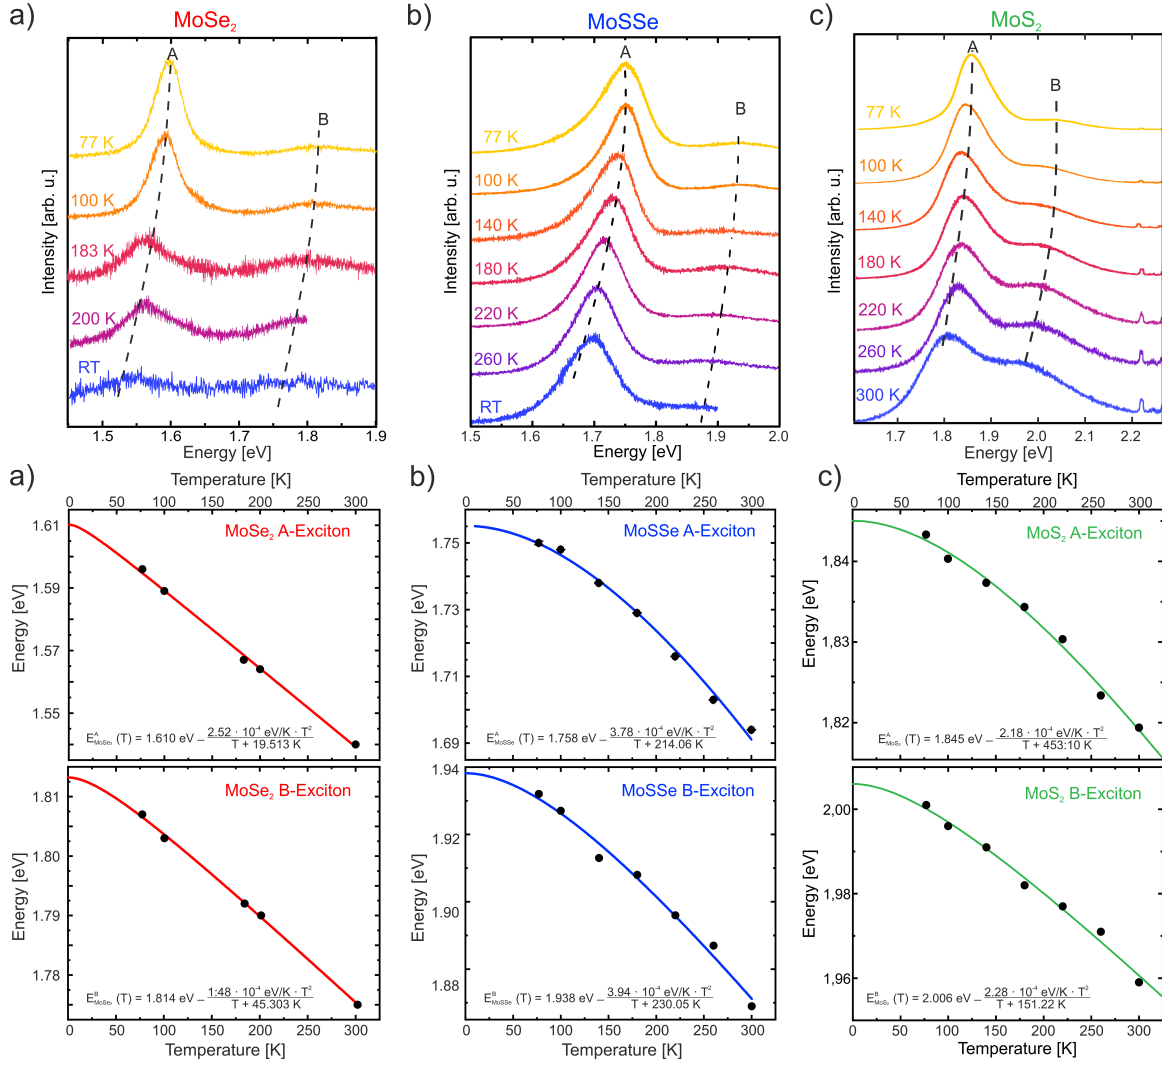

FIGURE S4. **Temperature dependence of the normalized photoluminescence spectra of different TMDCs.** (a) MoSe<sub>2</sub>, (b) MoSSe and (c) MoS<sub>2</sub>. Together with their corresponding Varshni fits for both their A- and B-excitons. Continuing the trend to 0 K gives rise to  $E_0$  for each exciton in each material, this being for the A-excitons 1.610 eV, 1.758 eV, and 1.845 eV and for the B-excitons 1.814 eV, 1.938 eV, and 2.006 eV, respectively.

## 5. COMPUTATIONAL DATA

To clarify our conclusion for the theoretical evaluation of strain and doping in our Janus monolayer, we show in Fig. S5 the strain dependent curves for the Raman shift of the  $A_{1g}$ -

and  $E_{2g}^1$ -modes at the fixed doping level which we concluded to be the two possibilities for our sample. These are either a n-type doping of  $-0.57 \cdot 10^{13} \text{ cm}^{-2}$  or  $-1.18 \cdot 10^{13} \text{ cm}^{-2}$ . From the image one can see clearly that at these doping levels, the two modes can only occur with the measured Raman shifts of  $289 \text{ cm}^{-1}$  and  $352 \text{ cm}^{-1}$  at a single strain value each. Those are  $-0.8\%$  and  $+0.4\%$  for the weaker and the stronger n-type doping, respectively.

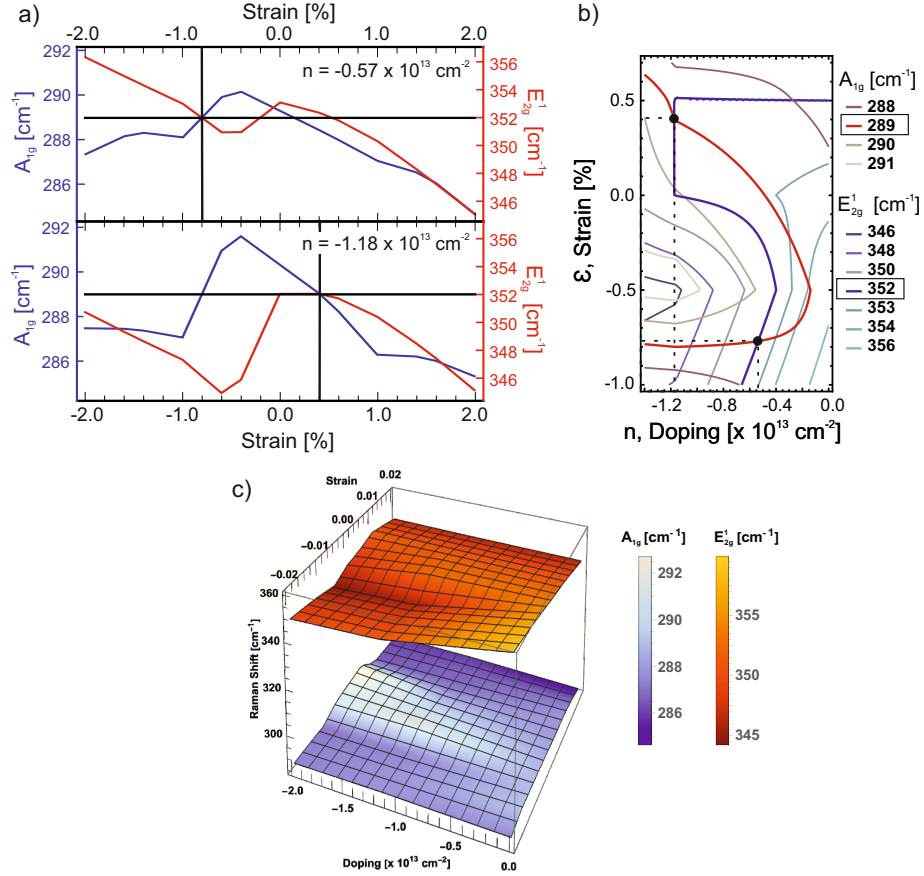

FIGURE S5. **Strain dependent Raman-mode shift for a constant doping level.** The (a) Raman shift dependence of the  $A_{1g}$ - (blue, left ordinate) and  $E_{2g}^1$ -mode (red, right ordinate) with variable strain. On top for a constant n-type doping of  $-0.57 \cdot 10^{13} \text{ cm}^{-2}$  and below for  $-1.18 \cdot 10^{13} \text{ cm}^{-2}$ . The horizontal line indicate the measured Raman shifts for the two modes. The two curves cross the horizontal line at the same abscissa at  $-0.8\%$  and  $+0.4\%$ , respectively. (b) Different depiction of the same data, with a strain versus doping display and the  $A_{1g}$  and  $E_{2g}^1$  Raman modes as contour lines. This version shows the same strain-doping combinations at the points where the lines for the  $289 \text{ cm}^{-1}$  and  $352 \text{ cm}^{-1}$  lines cross. (c) Displays the two mode shifts in a three dimensional plot.

## 6. TCSPC DATA OF MONOLAYER MOSSe

As briefly mentioned in the main body of this publication, we calibrated the TCSPC measurement by acquiring a dark residue photon counting measurement. Such a calibration spectra is shown in Fig. S6. This serves as a representative for all calibrations done. As can be seen in the figure, the calibration shows the expected noise like spectra for the dark residue photon counting, however, a peak at 9 ns can be seen. This peak is not seen at all in uncalibrated TCSPC measurements of the MoSSe monolayer, therefore when calibrating our measurements, a divot in the data appears around the 9 ns mark. This is a setup error, therefore not a real feature of the MoSSe TCSPC measurement and thus we decided to omit the few points for the fit of the biexponential curve, as it would otherwise falsify our results.

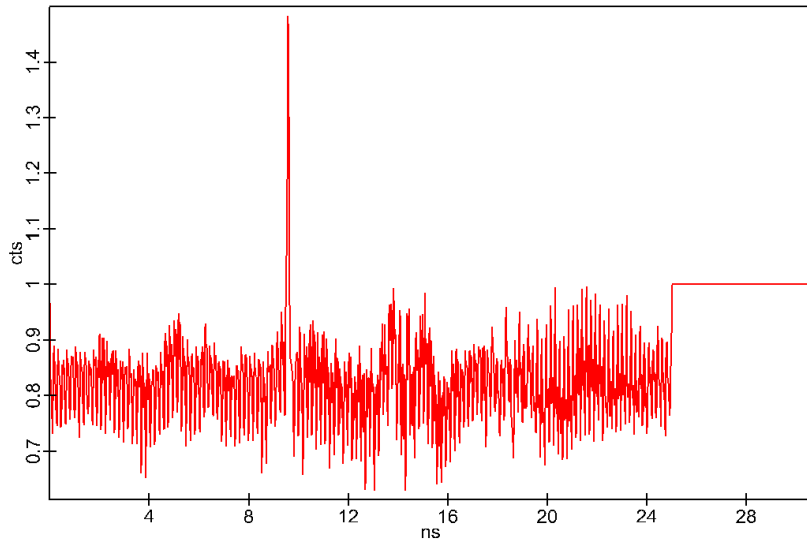

**FIGURE S6. Representative calibration spectrum for the TCSPC measurements.** Note a peak in the spectrum at 9 ns. This cannot be seen in the raw data of the TCSPC spectra, therefore this peak results in an over correction of the data, which can be seen as a divot in the calibrated spectra. Therefore, these few points can be excluded from the evaluation, as they do not represent a real phenomena.

The calibrated TCSPC measurements used to make a small statistic over different locations on the monolayer MoSSe is shown in Fig. S7. Note the different levels of signal-to-noise ratio, as the laser spot was sometimes a little bit more on the substrate and sometimes more on the multilayer part. Unfortunately, as the monolayer size was limited, we could not produce more accuracy. Nonetheless, all these decay show the typical longer and shorter lifetime, which we've been talking about in the main text, just the fit accuracy was somewhat limited for some of these measurements. A comprehensive overlook for the fit parameters of the TCSPC measurements and the calculated total average lifetime  $\tau_{tot}$  is given in Tab. S3.

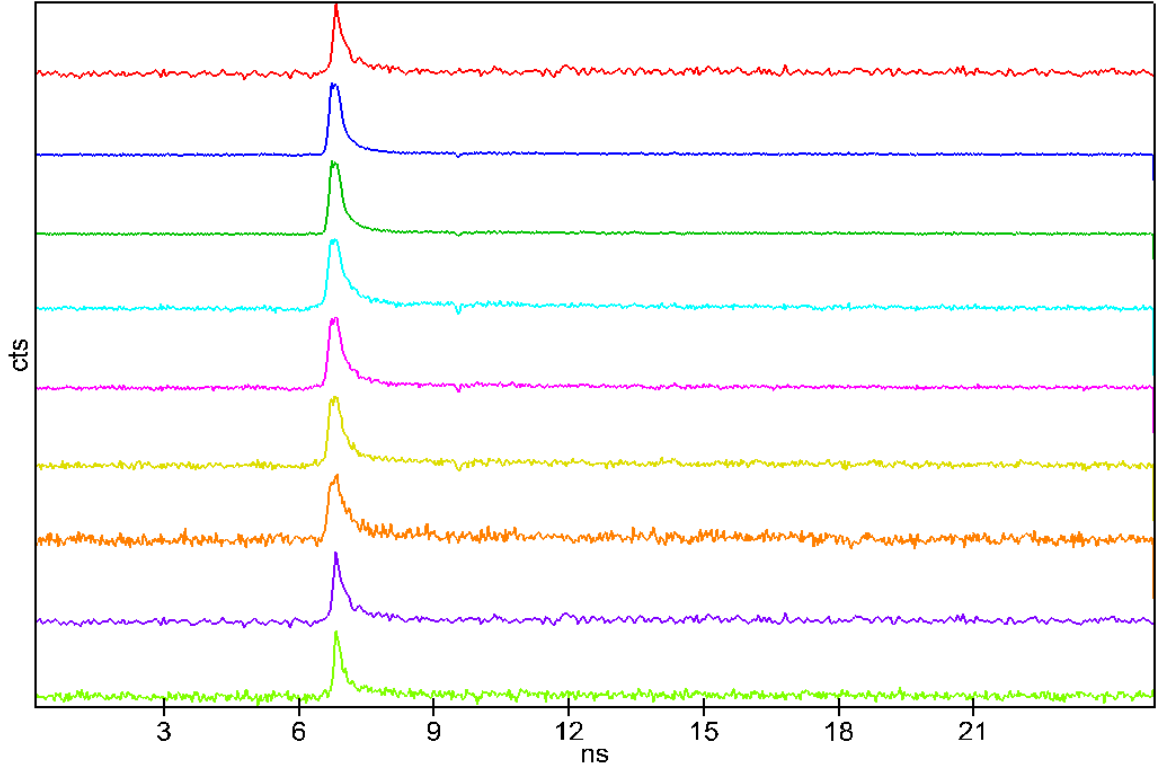

FIGURE S7. **TCSPC statistics.** All TCSPC calibrated spectra unaltered, as they were used to fit the biexponential decay function to. For the fits results see Tab. S3.

TABLE S3. Comprehensive overview of parameters obtained from fitting a biexponential decay function to the different TCSPC measurements seen in Fig. S7.  $\tau_i$  are the lifetimes and  $\Delta\tau_i$  the fits' error margin. The Amplitudes  $A_i$  are normalized to the total amplitude  $A_{ges} = \sum_i A_i$  in order to better compare the fraction of each exponential decay to the total fit. The total average lifetime is calculated as described in the main body of this work. The average and its standard deviation of each parameter are given in the last two columns.

|                     |       |       |       |       |       |       |       |       | Average | Std. dev. |
|---------------------|-------|-------|-------|-------|-------|-------|-------|-------|---------|-----------|
| $\tau_1$ [ps]       | 122   | 193   | 253   | 185   | 219   | 213   | 124   | 120   | 179     | 48        |
| $\Delta\tau_1$ [ps] | 14    | 23    | 23    | 61    | 6     | 86    | 5     | 5     |         |           |
| $A_1 / A_{ges}$     | 0.863 | 0.829 | 0.877 | 0.848 | 0.921 | 0.843 | 0.784 | 0.766 | 0.841   | 0.046     |
| $\tau_2$ [ns]       | 1.01  | 1.232 | 4.748 | 2.72  | 3.97  | 2.88  | 0.76  | 0.69  | 2.251   | 1.460     |
| $\Delta\tau_2$ [ns] | 0.303 | 0.347 | 1.63  | 2.05  | 0.522 | 2.80  | 0.054 | 0.048 |         |           |
| $A_2 / A_{ges}$     | 0.137 | 0.171 | 0.123 | 0.152 | 0.079 | 0.157 | 0.216 | 0.234 | 0.159   | 0.046     |
| $\tau_{tot}$ [ns]   | 0.627 | 0.783 | 3.513 | 2.024 | 2.507 | 2.120 | 0.523 | 0.483 | 1.573   | 1.058     |



## REFERENCES

- [1] Cheng, Y. C., Zhu, Z. Y., Tahir, M. & Schwingenschlögl, U. Spin-orbit-induced spin splittings in polar transition metal dichalcogenide monolayers. *EPL* **102**, 57001 (2013).
- [2] Ochedowski, O., Bussmann, B. K. & Schleberger, M. Graphene on mica - intercalated water trapped for life. *Sci. Rep.* **4**, 6003 (2014).
- [3] Raghavachari, K., Rohlfing, C. M. & Binkley, J. S. Structures and stabilities of sulfur clusters. *J. Chem. Phys.* **93**, 5862–5874 (1990).
- [4] Mahjouri-Samani, M. *et al.* Tailoring Vacancies Far Beyond Intrinsic Levels Changes the Carrier Type and Optical Response in Monolayer MoSe<sub>2-x</sub> Crystals. *Nano Letters* **16**, 5213–5220 (2016).
- [5] Pollmann, E. *et al.* Apparent differences between single layer molybdenum disulphide fabricated via chemical vapour deposition and exfoliation. *Nanotechnology* **31**, 505604 (2020).
- [6] Ajito, K., Sukamto, J. P. H., Nagahara, L. A., Hashimoto, K. & Fujishima, A. Strain imaging analysis of Si using Raman microscopy. *Journal of Vacuum Science & Technology A: Vacuum, Surfaces, and Films* **13**, 1234–1238 (1995).
- [7] Panasci, S. E. *et al.* Strain, Doping, and Electronic Transport of Large Area Monolayer MoS<sub>2</sub> Exfoliated on Gold and Transferred to an Insulating Substrate. *ACS applied materials & interfaces* **13**, 31248–31259 (2021).
- [8] Korn, T., Heydrich, S., Hirmer, M., Schmutzler, J. & Schüller, C. Low-temperature photocarrier dynamics in monolayer MoS<sub>2</sub>. *Applied Physics Letters* **99**, 102109 (2011).
- [9] Lundt, N. *et al.* Monolayered MoSe<sub>2</sub>: a candidate for room temperature polaritonics. *2D Materials* **4**, 015006 (2017).
- [10] Peng, B. *et al.* Thermal conductivity of monolayer MoS<sub>2</sub>, MoSe<sub>2</sub>, and WS<sub>2</sub>: interplay of mass effect, interatomic bonding and anharmonicity. *RSC Advances* **6**, 5767–5773 (2016).
